# Supplementary material for: Can smartphone technology be used to support an effective home exercise intervention to prevent falls amongst community dwelling older adults?: the TOGETHER feasibility RCT study protocol
Source: PubMed Central journal article supplement (PMC6756425; doi:10.1136/bmjopen-2018-028100), 2019-09-18

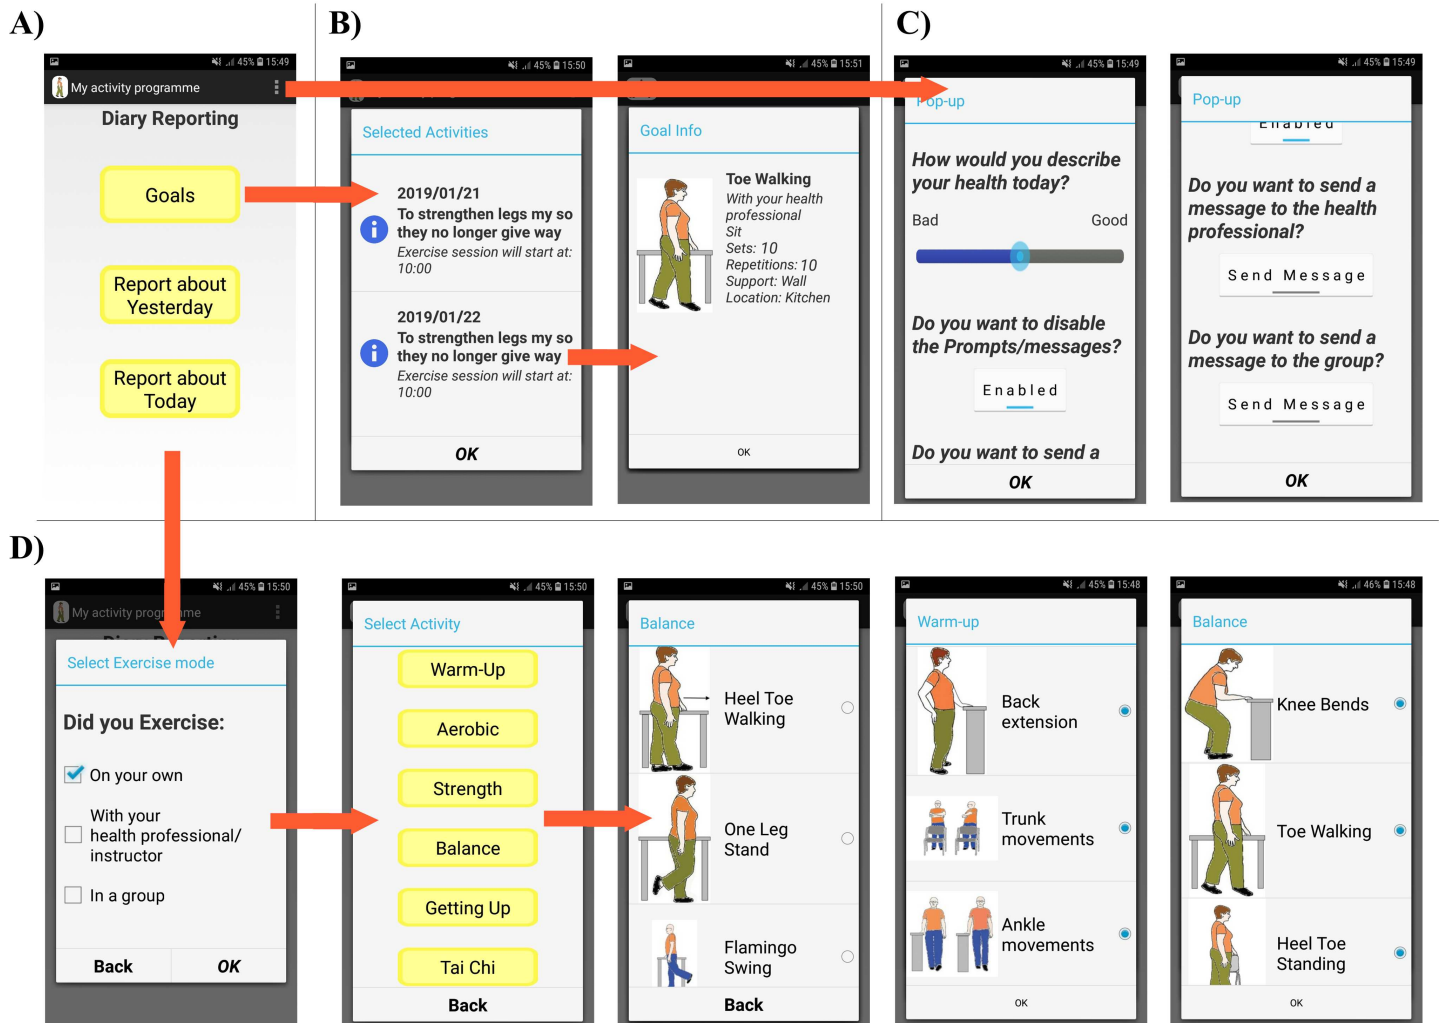

Supplement: bmjopen-2018-028100supp002.pdf [file bmjopen-2018-028100supp002.pdf]
